# Supplementary material for: Safety and Preliminary Efficacy of Vorinostat With R-EPOCH in High-risk HIV-associated Non-Hodgkin’s Lymphoma (AMC-075)
Source: PubMed Central journal article supplement — Clin Lymphoma Myeloma Leuk. Author manuscript; Available in PMC 2019 Aug 15. (PMC6697160; doi:10.1016/j.clml.2018.01.004), 2018-02-02
Supplement: NIHMS1040765-supplement-1.pdf [file NIHMS1040765-supplement-1.pdf]

**Supplemental Table 1 Dose Modifications for Cytopenias**

| Event                                                                                                                                                                                        | Action                                                                                                                                                                                                                                                                                                                                                                                                                                                                                                                                                                                                                                                                                                                                                                                                                                                                                     |
|----------------------------------------------------------------------------------------------------------------------------------------------------------------------------------------------|--------------------------------------------------------------------------------------------------------------------------------------------------------------------------------------------------------------------------------------------------------------------------------------------------------------------------------------------------------------------------------------------------------------------------------------------------------------------------------------------------------------------------------------------------------------------------------------------------------------------------------------------------------------------------------------------------------------------------------------------------------------------------------------------------------------------------------------------------------------------------------------------|
| ANC nadir on any cycle $<500/\text{mm}^3$ on 2 nonconsecutive days at least 3 d apart and/or platelets $<25,000/\text{mm}^3$ in the previous cycle                                           | <ol style="list-style-type: none"> <li>For subjects on vorinostat: <ul style="list-style-type: none"> <li>Reduce vorinostat by 100 mg daily (to a minimum of 200 mg daily). Give chemotherapy at dose in previous cycle (do not escalate cyclophosphamide).</li> <li>If event recurs after vorinostat dose reduction, reduce vorinostat again by 100 mg daily (to a minimum of 200 mg daily). Give chemotherapy at dose in previous cycle (do not escalate cyclophosphamide during vorinostat dose reduction).</li> <li>If event recurs after a minimum vorinostat dose of 200 mg, discontinue vorinostat permanently.</li> <li>If event recurs again after no vorinostat, reduce cyclophosphamide by <math>187 \text{ mg}/\text{m}^2</math>.</li> </ul> </li> <li>If subject has never received vorinostat, reduce cyclophosphamide by <math>187 \text{ mg}/\text{m}^2</math>.</li> </ol> |
| ANC $<500/\text{mm}^3 \times \geq 3 \text{ d}$ or platelets $<25,000/\text{mm}^3 \times \geq 3 \text{ d}$ , AND subject is receiving no cyclophosphamide or vorinostat in the previous cycle | Reduce doxorubicin and etoposide by 25% of the full dose.                                                                                                                                                                                                                                                                                                                                                                                                                                                                                                                                                                                                                                                                                                                                                                                                                                  |
| ANC nadir $\geq 500/\text{mm}^3$ AND platelet nadir $\geq 50,000/\text{mm}^3$ in the previous cycle                                                                                          | Increase cyclophosphamide dose by $187 \text{ mg}/\text{m}^2$ each cycle to maximum dose of $750 \text{ mg}/\text{m}^2$ .                                                                                                                                                                                                                                                                                                                                                                                                                                                                                                                                                                                                                                                                                                                                                                  |

Abbreviation: ANC = absolute neutrophil count.

**Supplemental Table 2 EPOCH Dose Modification for Day 1 Counts After a 2-Week Delay**

| Platelets                    | ANC (2-wk Delay)                                                                                                                                                                                                                                                                |                                                                                                                                                                                                                                                                                 |                                                  |
|------------------------------|---------------------------------------------------------------------------------------------------------------------------------------------------------------------------------------------------------------------------------------------------------------------------------|---------------------------------------------------------------------------------------------------------------------------------------------------------------------------------------------------------------------------------------------------------------------------------|--------------------------------------------------|
|                              | $\geq 1000/\text{mm}^3$                                                                                                                                                                                                                                                         | 750-999/ $\text{mm}^3$                                                                                                                                                                                                                                                          | $<750/\text{mm}^3$                               |
| $\geq 75,000/\text{mm}^3$    | Full-dose                                                                                                                                                                                                                                                                       | Reduce cyclophosphamide by $187 \text{ mg}/\text{m}^2$ . Do not administer cyclophosphamide if previous dose was $187 \text{ mg}/\text{m}^2$ . If the participant received no cyclophosphamide in the previous cycle, reduce doxorubicin and etoposide by 25% of previous dose. | Hold treatment and remove participant from study |
| 50,000-75,000/ $\text{mm}^3$ | Reduce cyclophosphamide by $187 \text{ mg}/\text{m}^2$ . Do not administer cyclophosphamide if previous dose was $187 \text{ mg}/\text{m}^2$ . If the participant received no cyclophosphamide in the previous cycle, reduce doxorubicin and etoposide by 25% of previous dose. |                                                                                                                                                                                                                                                                                 | Hold treatment and remove participant from study |
| $<50,000/\text{mm}^3$        | Hold treatment and remove participant from study.                                                                                                                                                                                                                               |                                                                                                                                                                                                                                                                                 |                                                  |

If ANC  $\geq 750/\text{mm}^3$  but  $< 1000/\text{mm}^3$ , or platelets  $\geq 50,000/\text{mm}^3$  but  $< 75,000/\text{mm}^3$  after 2-week delay, participant could be treated only after dose modifications per table above. Abbreviations: ANC = absolute neutrophil count; EPOCH = etoposide, prednisone, vincristine, cyclophosphamide, and doxorubicin.

# AMC-075: A Phase I Study of Vorinostat-R-EPOCH in Patients With HIV-NHL

**Supplemental Table 3** Doxorubicin, Etoposide, and Vincristine Clearance in the Presence or Absence of cART

|                                | n  | Doxorubicin (L/hr) | Etoposide (L/hr) | Vincristine (L/hr) |
|--------------------------------|----|--------------------|------------------|--------------------|
| <b>Vorinostat doses</b>        |    |                    |                  |                    |
| 1500 mg                        | 6  | 78.6 ± 48.0        | 3.0 ± 1.6        | 22.4 ± 10.2        |
| 2000 mg                        | 5  | 76.0 ± 47.9        | 2.4 ± 0.7        | 16.8 ± 8.9         |
| <b>cART-containing regimen</b> |    |                    |                  |                    |
| None or noninteracting         | 6  | 77.7 ± 45.2        | 3.0 ± 1.5        | 17.9 ± 11.8        |
| CYP3A4 inducer                 | 3  | 97.2 ± 49.0        | 2.5 ± 0.7        | 21.9 ± 9.1         |
| CYP3A4 inhibitor               | 2  | 10.6, 83.1         | 1.6, 2.8         | 20.1, 25.3         |
| Overall                        | 11 | 77.4 ± 45.5        | 2.7 ± 1.2        | 19.9 ± 9.6         |

Abbreviation: cART = combination antiretroviral therapy.
